# Supplementary material for: Effects of soil pH and texture on soil carbon and nitrogen in soil profiles under different land uses in Mun River Basin, Northeast Thailand
Source: PeerJ. 2019 Oct 15;7:e7880. doi: 10.7717/peerj.7880 (PMC6798867; doi:10.7717/peerj.7880)
Supplement: Supplemental Information 1 [file peerj-07-7880-s001.xlsx]

## Sheet: TC content
Depth (cm)	TS1 (g kg-1)	TS2 (g kg-1)	TS3 (g kg-1)	TS4 (g kg-1)	TS5 (g kg-1)	TS6 (g kg-1)	TS7 (g kg-1)
0	18.1104	17.9536	19.9806	5.85	8.68	3.264	13.5592
10	11.8944	12.83	10.0358	2.29	2.83	2.16	3.52
20	7.2016	12.23	6.75734	0.83	3.72	1.98	1.58
30	6.272		4.7265	0.79	1.9	1.92	1.76
40	5.11885		4.56	0.63	1.07	1.41	2.15
50	4.2672			0.77	1.0192	1.06
60	5.4656			0.65	0.5	0.87
70	6.0144			0.648	0.984	1.023
80	6.5968			0.57	1.236	1.254
90	6.5184			1.056	1.464	1.947
100	5.94				1.632	2.064
110	6.0816				1.722	1.876
120	5.3124				0.512	1.386
130	5.8464				0.688	1.482
140	4.9952				0.66	1.991
150	5.4992				1.824	2.94
160	5.2452				0.594	2.38
170	4.6345				0.468	1.98
180	4.7264				0.81	1.74
190	5.0875				1.404	1.49
200	4.9056					1.21
210	4.8262					1.42
220						0.77
230						0.686
240						0.588
250						0.602
260						0.518
270						0.663
280						0.68
290						0.663
300						0.627
310						0.714
320						0.935
330						0.765
340						0.884
350						0.646
360						0.68
370						0.833
380						0.68
390						0.68
400						2.88892

## Sheet: TN content
Depth (cm)	TS1 (g kg-1)	TS2 (g kg-1)	TS3 (g kg-1)	TS4 (g kg-1)	TS5 (g kg-1)	TS6 (g kg-1)	TS7 (g kg-1)
0	1.74	1.41	2.29	0.65	0.81	0.41	1.01
10	1.22	1.33	1.5	0.48	0.48	0.45	0.37
20	1.2	1.55	1.04	0.29	0.44	0.39	0.3
30	1.08		0.9	0.2	0.31	0.39	0.33
40	0.85		0.87	0.23	0.23	0.33	0.28
50	0.93			0.26	0.27	0.24
60	0.73			0.26	0.16	0.3
70	1			0.16	0.22	0.27
80	1.06			0.17	0.38	0.38
90	0.88			0.24	0.44	0.42
100	0.83				0.45	0.4
110	0.97				0.42	0.31
120	1.02				0.26	0.37
130	0.79				0.24	0.33
140	0.99				0.22	0.35
150	0.85				0.48	0.34
160	1				0.22	0.4
170	0.79				0.23	0.28
180	0.94				0.37	0.32
190	0.86				0.51	0.36
200	0.83					0.27
210	0.86					0.4
220						0.38
230						0.37
240						0.37
250						0.44
260						0.38
270						0.36
280						0.37
290						0.37
300						0.35
310						0.33
320						0.34
330						0.46
340						0.38
350						0.47
360						0.45
370						0.49
380						0.38
390						0.41
400						0.47

## Sheet: TOC content
Depth (cm)	TS1 (g kg-1)	TS2 (g kg-1)	TS3 (g kg-1)	TS4 (g kg-1)	TS5 (g kg-1)	TS6 (g kg-1)	TS7 (g kg-1)
0	15.4484	15.2891	18.8274	5.61754	7.45015	2.78421	11.9183
10	11.2869	12.5437	9.53758	1.69975	2.52525	1.78645	3.49254
20	6.12083	11.159	6.15885	0.57884	3.1102	1.74572	1.08676
30	5.92136		4.5589	0.60528	1.58326	1.80579	1.06931
40	5.10576		4.16025	0.48159	1.02276	1.40377	1.44892
50	4.12742			0.63048	0.95125	0.99482
60	4.67575			0.56979	0.4162	0.81857
70	5.44943			0.59565	0.88913	0.98323
80	6.08981			0.44946	0.86694	1.20196
90	5.92777			0.95671	0.97782	1.87149
100	5.91833				1.35539	1.99722
110	5.39938				1.63413	1.86934
120	5.30987				0.50838	1.36561
130	5.18658				0.51515	1.4231
140	4.74608				0.63839	1.65127
150	5.11216				1.81914	1.49972
160	5.21365				0.56647	1.55957
170	4.52678				0.42217	1.66595
180	4.61351				0.70645	1.64895
190	4.74823				1.27234	1.36332
200	4.22704					1.1874
210	4.55293					1.05085
220						0.67819
230						0.62783
240						0.55464
250						0.39242
260						0.33657
270						0.65738
280						0.62585
290						0.54997
300						0.62698
310						0.63208
320						0.87286
330						0.61246
340						0.64803
350						0.60945
360						0.35758
370						0.47698
380						0.45644
390						0.35224
400						0.75034

## Sheet: TON content
Depth (cm)	TS1 (g kg-1)	TS2 (g kg-1)	TS3 (g kg-1)	TS4 (g kg-1)	TS5 (g kg-1)	TS6 (g kg-1)	TS7 (g kg-1)
0	1.19779	1.35	2.04614	0.59391	0.48002	0.07734	0.55804
10	1	0.89636	1.20456	0.13816	0.15651	0.21476	0.15811
20	0.7095	1.19868	0.99884	0.06901	0.25519	0.12538	0.06895
30	0.82359		0.62045	0.07872	0.09763	0.20279	0.03944
40	0.82		0.60594	0.02925	0.08898	0.12674	0.17767
50	0.882			0.0098	0.18594	0.05857
60	0.65			0.02911	0.04962	0.01946
70	0.93			0.03948	0.09781	0.01961
80	0.96			0.03937	0.34055	0.15701
90	0.79			0.17644	0.26192	0.23319
100	0.74867				0.37173	0.31146
110	0.80286				0.38225	0.14629
120	0.89673				0.22208	0.23369
130	0.65187				0.16339	0.18469
140	0.98911				0.15383	0.20378
150	0.80718				0.45764	0.22644
160	0.88909				0.16378	0.31454
170	0.75				0.12793	0.16373
180	0.59056				0.34898	0.21202
190	0.81938				0.43277	0.20145
200	0.71996					0.2309
210	0.80417					0.33438
220						0.34635
230						0.29114
240						0.36276
250						0.35456
260						0.35228
270						0.30598
280						0.36982
290						0.2769
300						0.25649
310						0.321
320						0.29524
330						0.34264
340						0.36427
350						0.34259
360						0.41259
370						0.45515
380						0.25621
390						0.24192
400						0.40586

## Sheet: TIC content
Depth (cm)	TS1 (g kg-1)	TS2 (g kg-1)	TS3 (g kg-1)	TS4 (g kg-1)	TS5 (g kg-1)	TS6 (g kg-1)	TS7 (g kg-1)
0	2.66196	2.66454	1.15324	0.23246	1.22985	0.47979	1.64086
10	0.60746	0.2863	0.49826	0.59025	0.30475	0.37355	0.02746
20	1.08077	1.07096	0.5985	0.25116	0.6098	0.23428	0.49324
30	0.35064		0.1676	0.18472	0.31674	0.11421	0.69069
40	0.01309		0.39975	0.14841	0.04724	0.00623	0.70108
50	0.13978			0.13952	0.06795	0.06518
60	0.78985			0.08021	0.0838	0.05143
70	0.56497			0.05235	0.09487	0.03977
80	0.50699			0.12054	0.36906	0.05204
90	0.59063			0.09929	0.48618	0.07551
100	0.02167				0.27661	0.06678
110	0.68222				0.08787	0.00666
120	0.00253				0.00362	0.02039
130	0.65982				0.17285	0.0589
140	0.24912				0.02161	0.33973
150	0.38704				0.00486	1.44028
160	0.03155				0.02753	0.82043
170	0.10772				0.04583	0.31405
180	0.11289				0.10355	0.09105
190	0.33927				0.13166	0.12668
200	0.67856					0.0226
210	0.27327					0.36915
220						0.09181
230						0.05817
240						0.03336
250						0.20958
260						0.18143
270						0.00562
280						0.05415
290						0.11303
300						0
310						0.08192
320						0.06214
330						0.15254
340						0.23597
350						0.03655
360						0.32242
370						0.35602
380						0.22356
390						0.32776
400						2.14

## Sheet: TIN content
Depth (cm)	TS1 (g kg-1)	TS2 (g kg-1)	TS3 (g kg-1)	TS4 (g kg-1)	TS5 (g kg-1)	TS6 (g kg-1)	TS7 (g kg-1)
0	0.54221	0.06	0.24386	0.05609	0.32998	0.33266	0.45196
10	0.22	0.43364	0.29544	0.34184	0.32349	0.23524	0.21189
20	0.4905	0.35132	0.04116	0.22099	0.18481	0.26462	0.23105
30	0.25641		0.27955	0.12128	0.21237	0.18721	0.29056
40	0.03		0.26406	0.20075	0.14102	0.20326	0.10233
50	0.048			0.2502	0.08406	0.18143
60	0.08			0.23089	0.11038	0.28054
70	0.07			0.12052	0.12219	0.25039
80	0.1			0.13063	0.03945	0.22299
90	0.09			0.06356	0.17808	0.18681
100	0.08133				0.07827	0.08854
110	0.16714				0.03775	0.16371
120	0.12327				0.03792	0.13631
130	0.13813				0.07661	0.14531
140	0				0.06617	0.14622
150	0.04282				0.02236	0.11356
160	0.11091				0.05622	0.08546
170	0.04				0.10207	0.11627
180	0.34944				0.02102	0.10798
190	0.04062				0.07723	0.15855
200	0.11004					0.0391
210	0.05583					0.06562
220						0.03365
230						0.07886
240						0.00724
250						0.08544
260						0.02772
270						0.05402
280						0
290						0.0931
300						0.09351
310						0.009
320						0.04476
330						0.11736
340						0.01573
350						0.12741
360						0.03741
370						0.03485
380						0.12379
390						0.16808
400						0.06

## Sheet: Ratio of C,N
Depth (cm)	TS1	TS2	TS3	TS4	TS5	TS6	TS7
0	10.4083	12.7331	8.72516	9	10.716	7.96098	13.4249
10	9.74951	9.64662	6.69056	4.77083	5.89583	4.8	9.51351
20	6.00133	7.89032	6.49744	2.86207	8.45455	5.07692	5.26667
30	5.80741		5.25167	3.95	6.12903	4.92308	5.33333
40	6.02218		5.24138	2.73913	4.65217	4.27273	7.67857
50	4.58839			2.96154	3.77481	4.41667
60	7.48712			2.5	3.125	2.9
70	6.0144			4.05	4.47273	3.78889
80	6.2234			3.35294	3.25263	3.3
90	7.40727			4.4	3.32727	4.63571
100	7.15663				3.62667	5.16
110	6.26969				4.1	6.05161
120	5.20824				1.96923	3.74595
130	7.40051				2.86667	4.49091
140	5.04566				3	5.68857
150	6.46965				3.8	8.64706
160	5.2452				2.7	5.95
170	5.86646				2.03478	7.07143
180	5.02809				2.18919	5.4375
190	5.9157				2.75294	4.13889
200	5.91036					4.48148
210	5.61186					3.55
220						2.02632
230						1.85405
240						1.58919
250						1.36818
260						1.36316
270						1.84167
280						1.83784
290						1.79189
300						1.79143
310						2.16364
320						2.75
330						1.66304
340						2.32632
350						1.37447
360						1.51111
370						1.7
380						1.78947
390						1.65854
400						6.14664

## Sheet: Soil pH
Depth (cm)	TS1	TS2	TS3	TS4	TS5	TS6	TS7
0	5.60333	6.075	5.545	5.71	5.49	4.325	4.23
10	5.93	6.275	4.785	4.835	5.43	4.215	4.97
20	6.09333	6.455	4.915	5.15	5.33	4.545	5.015
30	5.98		5.15	5.465	6.015	4.82	5.25667
40	5.69		6.365	5.555	6.095	4.88	4.58667
50	6.12			5.63	6.395	4.875
60	6.225			5.69	6.475	4.90667
70	6.17			5.665	6.52	5.185
80	6.275			5.72	6.17	5.13
90	6.215			5.635	6.215	5.175
100	6.26			5.615	6.24	5.28
110	6.305			5.52	6.29	5.69
120	6.505			5.47	6.4	5.715
130	6.33			5.46	6.545	5.96333
140	6.365			5.455	6.655	6.96
150	6.32			5.48	6.845	7.005
160	6.205			5.435	7.22	7.265
170	6.29			5.005	7.4	7.375
180	6.23			5.49	7.2	7.325
190	6.27				6.57	7.075
200	6.24					7.21
210	6.03					7.945
220						8.025
230						7.88
240						7.735
250						7.63
260						7.12
270						7.21
280						6.94
290						6.925
300						7.025
310						6.645
320						7.045
330						6.65
340						6.71
350						6.5
360						6.765
370						7.03
380						7.15
390						6.605
400						7.085

## Sheet: clay, silt and sand (%)
		TS1 %			TS2 %			TS3 %			TS4 %			TS5 %			TS6 %			TS7 %
Depth (cm)	sand	clay	silt	sand	clay	silt	sand	clay	silt	sand	clay	silt	sand	clay	silt	sand	clay	silt	sand	clay	silt
0	0.233	13.816	85.952	2.499	12.142	85.358	12.407	11.936	75.657	54.178	2.73	43.091	64.246	4.246	31.508	43.973	4.891	51.136	70.682	3.141	26.175
10	0.134	17.998	81.867	6.501	9.092	84.407	12.694	11.271	76.036	46.956	3.071	49.973	78.568	2.759	18.673	35.759	5.943	58.298	67.589	3.868	28.543
20	0.047	14.903	85.052	5.565	8.877	85.559	4.503	14.602	80.895	57.261	2.649	40.088	63.929	4.773	31.297	36.921	5.678	57.4	71.61	3.683	24.709
30	0.374	17.627	81.999				8.819	13.93	77.25	58.007	2.754	39.237	71.228	3.735	25.038	38.94	5.534	55.527	67.039	4.612	28.35
40	2.382	11.596	86.021				8.158	15.268	76.574	51.748	2.819	45.434	67.53	4.926	27.545	38.697	5.711	55.593	66.062	4.916	29.021
50	4.672	10.504	84.825							51.886	3.431	44.681	57.686	4.496	37.819	43.52	5.111	51.369	62.689	5.107	32.203
60	0.962	14.606	84.431							51.67	3.093	45.238	73.599	2.571	23.83	45.211	5.321	49.469
70	0.938	13.85	85.212							54.882	2.746	42.373	60.04	3.881	36.079	42.532	6.182	51.285
80	0.155	15.025	84.819							51.691	3.683	44.626	43.529	5.619	50.851	37.572	6.685	55.745
90	0.375	14.533	85.092							43.319	5.74	50.941	39.736	3.977	56.288	28.819	6.001	65.18
100	0.124	12.498	87.377										41.078	5.311	53.612	30.298	6.507	63.196
110	0.362	15.102	84.537										31.162	6.652	62.186	42.294	6.944	50.76
120	1.567	12.967	85.466										58.021	3.423	38.557	20.908	6.163	72.929
130	1.602	13.119	85.278										58.219	3.508	38.271	19.743	6.288	73.97
140	1.725	13.176	85.099										61.433	3.276	35.29	16.08	6.814	77.107
150	1.979	14.212	83.807										35.331	6.362	58.309	14.011	8.142	77.847
160	1.826	12.765	85.41										65.119	2.992	31.89	25.676	9.654	64.67
170	2.445	11.833	85.723										60.808	3.706	35.486	49.277	11.418	39.305
180	2.199	11.362	86.439										44.689	6.49	48.821	40.476	12.459	47.066
190	2.887	11.555	85.557										30.514	8.998	60.489	31.141	10.367	58.491
200	2.157	13.073	84.772										50.7309	4.7508	44.5185	38.18	12.198	49.621
210	1.62344	13.1362	85.2403										32.8586	7.89088	59.2506	6.258	16.519	77.224
220																3.144	10.27	86.585
230																3.457	10.376	86.167
240																3.01	10.38	86.609
250																3.784	11.658	84.558
260																4.038	10.439	85.524
270																4.152	10.168	85.681
280																5.563	12.414	82.022
290																5.451	10.832	83.716
300																4.911	11.006	84.082
310																12.023	9.213	78.763
320																25.159	12.06	62.781
330																10.742	12.476	76.781
340																11.415	10.715	77.872
350																3.978	10.531	85.49
360																4.975	10.044	84.98
370																6.482	9.42	84.1
380																11.445	8.407	80.149
390																15.422	9.42	75.158
400																28.72	7.809	63.471
